1 **Title:** SARS-CoV-2 amino acid substitutions widely spread in the human population are  
2 mainly located in highly conserved segments of the structural proteins.

3 **Authors:** Martí Cortey<sup>1\*</sup>, Yanli Li<sup>1</sup>, Ivan Díaz<sup>2</sup>, Hepzibar Clilverd<sup>1</sup>, Laila Darwich<sup>1,2</sup>, Enric  
4 Mateu<sup>1,2</sup>

5 **Affiliations:** 1 Dept Sanitat i Anatomia Animals, Facultat de Veterinària, Travessera  
6 dels Turons s/n, Universitat Autònoma de Barcelona, 08193 Cerdanyola del Vallès,  
7 Spain.

8 2 Centre de Recerca en Sanitat Animal (CRESA-IRTA-UAB), campus UAB,  
9 Universitat Autònoma de Barcelona, 08193 Cerdanyola del Vallès, Spain.

10 \*Corresponding autor

11 E-mail: [marti.cortey@uab.cat](mailto:marti.cortey@uab.cat)

12 **Telephone:** +34 935813297

13

14 **Abstract**

15 The *Severe acute respiratory syndrome coronavirus 2* (SARS-CoV-2) pandemic offers a  
16 unique opportunity to study the introduction and evolution of a pathogen into a  
17 completely naïve human population. We identified and analysed the amino acid  
18 mutations that gained prominence worldwide in the early months of the pandemic.  
19 Eight mutations have been identified along the viral genome, mostly located in  
20 conserved segments of the structural proteins and showing low variability among  
21 coronavirus, which indicated that they might have a functional impact. At the moment  
22 of writing this paper, these mutations present a varied success in the SARS-CoV-2 virus  
23 population; ranging from a change in the spike protein that becomes absolutely  
24 prevalent, two mutations in the nucleocapsid protein showing frequencies around 25%,  
25 to a mutation in the matrix protein that nearly fades out after reaching a frequency of  
26 20%.

27 Keywords: SARS-CoV-2, pandemia, mutation, coronavirus, fitness

## 28 **1. Introduction**

29 The emergence of the novel *Severe acute respiratory syndrome coronavirus 2* (SARS-  
30 CoV-2) and the subsequent pandemic has become a health problem unparalleled in the  
31 last century. SARS-CoV-2 is thought to be originated from an animal coronavirus that  
32 successfully adapted to humans. The species of origin of SARS-CoV-2 has not been fully  
33 identified, but the virus seems to be related to SARS-CoV and other coronaviruses found  
34 in bats and other mammal species, although different from them (Chan et al. 2020; Lu  
35 et al. 2020; Zhou et al. 2020).

36 The SARS-CoV-2 genome size is around 30 kb with the typical gene structure known in  
37 other betacoronaviruses: starting from the 5', more than two-thirds of the genome  
38 comprises orf1ab encoding polyproteins (nsp1 to nsp15), while the last third consists of  
39 genes encoding major structural proteins; including spike (S or ORF2), envelope (E or  
40 ORF4), membrane (M or ORF5), and nucleocapsid (N or ORF9) proteins. Additionally, the  
41 SARS-CoV-2 contains at least 6 minor structural proteins, encoded by ORF3a, ORF6,  
42 ORF7a, ORF7b, ORF8, and ORF10 genes (Khailany et al. 2020).

43 The first cases of the novel coronavirus associated disease (CoVID-19) have been traced  
44 to the Chinese province of Hubei in early December 2019  
45 (<https://www.who.int/csr/don/12-january-2020-novel-coronavirus-china/en/>).

46 Although the actual index case is not really known, the first sequence of the novel  
47 coronavirus was produced within weeks from the emergence of the disease (Zhu et al.  
48 2019). As of the moment of writing this paper, more than 16,000 sequences have been  
49 produced in less than five months since the start of the pandemic. This is a unique  
50 opportunity to gain insight on the evolution of a betacoronavirus in a completely naïve

51 human population. In this context, viral variants efficiently transmitted will have less  
52 influence of the selection exerted by the immune response, since most transmissions  
53 will occur from individuals before the development of an efficient immune response to  
54 naïve recipients.

55 The aim of the present study was to determine the amino acid substitutions in viral  
56 proteins that were widely present in available sequences of SARS-CoV-2, relating them  
57 to the known chronology of the pandemic. Also, the mutations found were assessed in  
58 order to try to understand its potential significance for viral fitness.

## 59 **2. Material and methods**

### 60 **2.1. Sequences**

61 SARS-CoV-2 sequences were retrieved from GISAID database (<https://www.gisaid.org/>).  
62 The full set of sequences used in the present study included the 12,562 high-quality  
63 complete sequences available on May 3<sup>rd</sup>, 2020. Additionally, a reference sequence from  
64 SARS-CoV, pangolin, civet, and three from bat coronaviruses (Genbank accession  
65 numbers AY278741, MT084071, AY572034, KY417146, MN996532 and MK211376,  
66 respectively) were used for comparative purposes. The set of sequences were arranged  
67 chronologically by date of isolation after the first reported SARS-CoV-2 sequences  
68 (identified as Wuhan-01 from December 24<sup>th</sup>, 2019).

### 69 **2.2. Analysis of non-synonymous mutations and selection of mutations to be studied**

70 Complete genomes were aligned using the multiple alignment program ClustalW  
71 (Thompson et al. 1994) and consequently split by week according to their isolation date  
72 with the sequence alignment editor Bioedit (Hall 1999). Using Wuhan-01 as the  
73 reference, an arbitrary date for the 1st report of the amino acid changes at the end of

74 February 2020 was set to represent an early date of the pandemic, three months after  
75 the initial case was reported. Also, an arbitrary cut-off frequency of 10% was set to select  
76 the amino acid substitutions that were considered widespread. Thus, any substitution  
77 reported before the end of February and present in 10% or more of the frequencies in a  
78 given week was studied. In order to check if the variants identified presented a  
79 worldwide distribution, their geographical distribution was summarized by continents.  
80 For each substitution, an alignment with the homologous proteins of SARS-CoV, civet,  
81 pangolin, and bat coronaviruses was performed to assess whether the mutation  
82 affected conserved or variable regions.

### 83 **2.3 Comparison with predominant amino acid substitutions in early, mid and late** 84 **cases of SARS epidemic of 2003-04**

85 To compare predominant non-synonymous mutations occurring during different phases  
86 of the 2003 SARS-CoV epidemic, all sequences of SARS-CoV available at Genbank for  
87 which date of the case was available (directly or through literature search) were  
88 collected. Sequences were classified as early, mid or late based on the common  
89 classifications of cases (He et al. 2004). Analysis of mutations was done similarly to SARS-  
90 CoV-2.

### 91 **2.4 Analysis of the potential biological significance of the observed substitutions**

92 Modelling of the original S protein in Wuhan-01 and the mutant protein was produced  
93 using SWISS-MODEL protein template 6vsb.1.A (<https://swissmodel.expasy.org/>).  
94 Accuracy of the models was assessed by the Global Model Quality Estimation (GQME)  
95 and the Qualitative Model Energy Analysis (QMEAN) scores. 3D structures were  
96 rendered using PyMOL (The PyMOL Molecular Graphics System, Version 2.3.4.

97 Schrödinger, LLC). The same program was used to determine changes in the protein  
98 structure or distances between atoms or residues. The set of proteomic utilities in  
99 EXPASY (<https://www.expasy.org/proteomics>) was used to check for different aspects  
100 on the mutant proteins (motifs, phosphorylation sites, etc.). PROVEAN 1.1.  
101 (<http://provean.jcvi.org/>, Choi et al. 2012) was used to gain insight on whether the  
102 mutation could be deleterious or neutral. Changes in the secondary structure of proteins  
103 were predicted by using the CFSSP: Chou & Fasman Secondary Structure Prediction  
104 Server (<https://www.biogem.org/tool/chou-fasman/>, Ashok 2013).

105 When mutations affected known epitopes, impact on antigenicity was evaluated by  
106 means of epitope prediction tools in the IBDB Resource web (<http://tools.iedb.org/>).

### 107 **3 Results**

#### 108 **3.1. Amino acid substitutions with significant spread in the population were mainly** 109 **located in conserved segments of structural proteins of SARS-CoV-2**

110 The analysis of the set of sequences revealed that only 8 amino acid substitutions across  
111 the viral genome appeared before the end of February 2020 and gained prevalence over  
112 10% of the known isolates at a given time point, measuring time in weeks after the first  
113 available sequence (Fig. 1). Of these, 7 substitutions were in the structural proteins  
114 (ORF2-S, ORF3a, ORF5-M, ORF8, and ORF9-N) and one in the ORF1ab, specifically in  
115 nsp6. Concerning their location and date, four appeared in China during January. The  
116 other four appeared in Europe during the second fortnight of February, but within a  
117 week, they were also reported in other continents (Supplementary Table S1).  
118 Interestingly, the only substitution that became fully predominant was Asp614Gly in the  
119 spike protein (ORF2-S). Gly57His in ORF3a reached a frequency of 50% at the moment

120 of writing this paper. It is worth noting that when the sequences were analysed by  
121 continents, all mutations were spread worldwide, except the 175Met in the ORF5-M,  
122 that was absent in Africa (Supplementary Table S1).

123 **Figure 1.** Temporal trends in the emergence and prevalence of the amino acid  
124 substitutions that appeared before the end of February 2020 and were present in >10%  
125 of SARS-CoV-2 sequences at any time between December 2019 and May 2020. The X-axis  
126 represents time measured as weeks since December 24<sup>th</sup>, 2019 and the Y-axis  
127 represents the proportion of known sequences harbouring a given mutation.

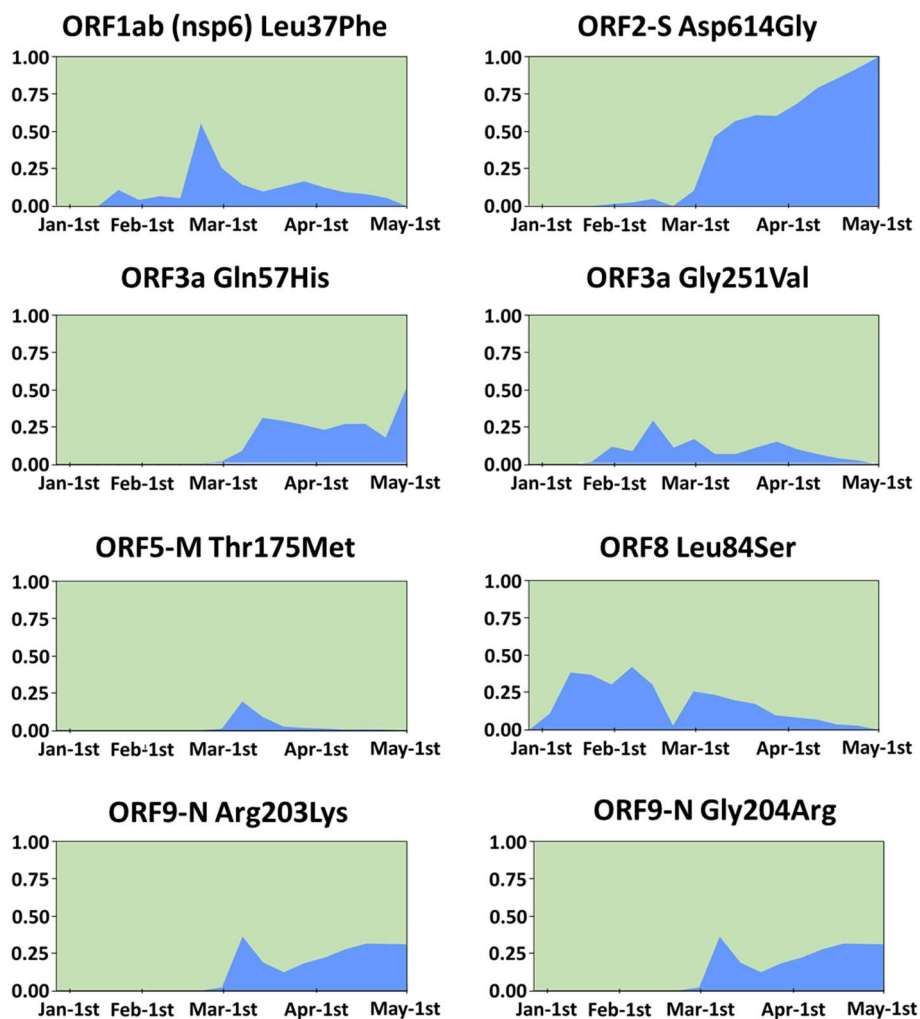

128

129 Next, we examined whether these substitutions were located in variable or conserved  
130 regions of the viral genome. Interestingly, most of them corresponded to residues that

131 were conserved in SARS and related betacoronaviruses of pangolins, civets, or bats (Fig.  
132 2).

133 The comparison with non-synonymous mutations that gained predominance in SARS-  
134 CoV showed a different pattern. From early to late phases of the SARS epidemic of 2003,  
135 11 substitutions gained wide spread. Three of them were located in nsp3, four in nsp4,  
136 one in nsp16, and three in the spike protein (Supplementary Table S2). However,  
137 mutations in SARS-CoV were located in conserved positions of civet and bat-related  
138 coronaviruses but, those positions were different in pangolin.

139 **Figure 2.** Location of the mutations found in the present study and corresponding amino  
140 acids in pangolin, SARS-CoV, civet, and bat-related coronaviruses. One-letter code is  
141 used to represent amino acids. A dot is used to indicate a conserved residue compared  
142 to the first sequence in the alignment (SARS-CoV-2 isolate Wuhan-01).

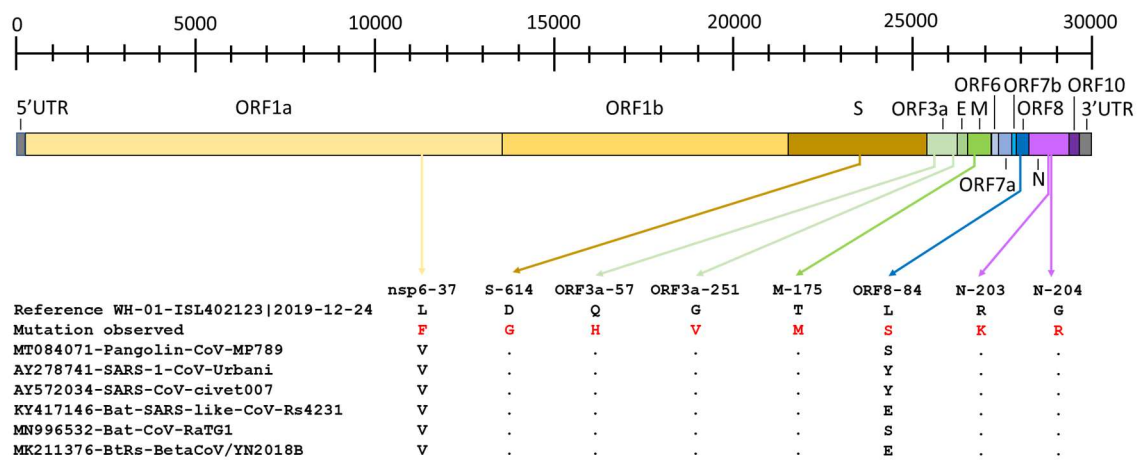

143

144

### 145 3.2. Substitutions in the major structural proteins S, N and M

146 The examination of the spike protein sequences of SARS-CoV-2 revealed that the  
147 Asp614Gly mutation that appeared in January 2020 in Shanghai, gained predominance  
148 with time. Thus, by the end of April 2020 it was almost 100% prevalent (Fig. 1).



149 Next, we checked whether this mutation emerged in a particular SARS-CoV-2 clade or  
150 its spread was irrespective of the clade where a given isolate could be allocated. The  
151 Gly614 could be found in different branches across the phylogenetic tree of SARS-CoV-  
152 2 (available at <https://nextstrain.org/>).

153 Residue 614 is located in the S1 domain of the spike protein. Modelling of the original  
154 and mutant proteins using template 6vsb.1.A from SwissModel of the S protein of SARS-  
155 CoV-2 (Wrap et al. 2020) showed that by changing Asp614 by Gly614, the distance to  
156 Thr859 and its side chain increased (from 2.7 to 6.2 Å), creating a cavity and a more  
157 relaxed structure (Fig. 3). The analysis of the antigenicity of the potential epitope  
158 homologous to 597-625 of SARS-CoV did not show any significant difference between  
159 mutants.

160 **Figure 3.** Changes in the 3-D structure of the S-protein in the original (A) and mutant (B)  
161 proteins. The pictures show amino acid residues on 20Å distance from Asp614 (A) or  
162 Gly614 (B) and their distance to Thr859.

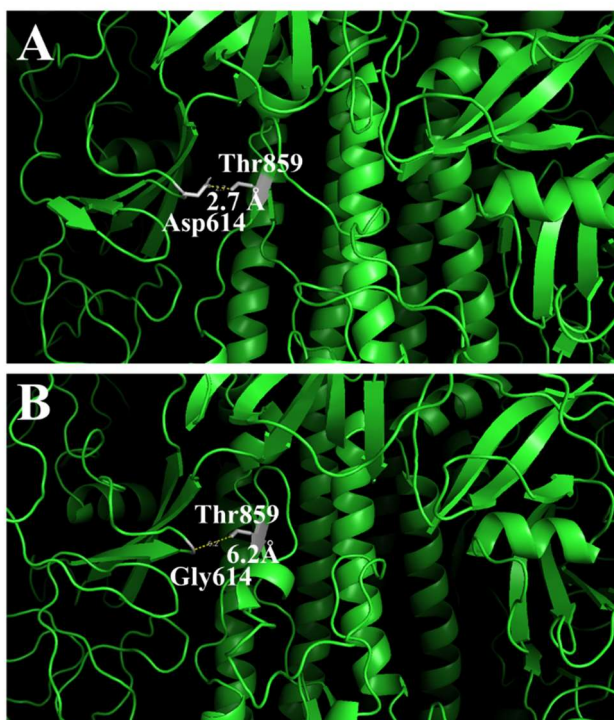

163

164 In the nucleocapsid phosphoprotein, a double mutation (Arg203Lys-Gly204Arg) was  
165 observed to gain predominance during the pandemic (Fig. 1). This mutation is in the  
166 serin-rich (SR) segment of the linker region (LKR) of the protein. The N protein of SARS-  
167 CoV is known to be bound by Ubc9, a ubiquitin conjugating enzyme of the sumoylation  
168 system, probably at the SR segment. Since lysines are targets for sumoylation, we next  
169 checked whether this substitution could introduce a sumoylation motif. The prediction  
170 using two different methods JASSA v4 (<http://www.jassa.fr/index.php?m=jassa>) and  
171 GPS-SUMO (<http://sumosp.biocuckoo.org/>) was negative. Predicted phosphorylation  
172 sites and enzymes (NetPhos 3.1.) were not significantly different between variants. The  
173 observed mutations were predicted to be neutral by Provean.

174 In the matrix protein, the main change was the substitution of Thr175 by Met175.  
175 Thr175 was predicted to form part of a motif known to interact with 14-3-3 proteins and  
176 of a potential phosphorylation site (173-SRTLSYYKL-181) targeted by protein kinases A  
177 (PKA) and C (PKC), ribosomal s6 kinase (RKS), and DNA-dependent protein kinases. The  
178 substitution of the THR by a MET was predicted again to be a phosphorylation site (for  
179 PKA, PKC and RKS). Provean predicted that the introduction of M175 was deleterious  
180 (score -3.135). Since no reliable model was available, 3D structure could not be assessed.  
181 Interestingly, the presence of a M175 in the M protein occurred together with the  
182 203KR204 mutation in 98% of the cases ( $p < 0.0001$ ). The rapid decay of this mutation  
183 (Fig. 1) would be consistent with a deleterious effect.

184 **3.3. Substitutions in the minor structural proteins 3a and 8, and the non-structural**  
185 **protein nsp6**

186 Two substitutions were identified in the protein encoded by ORF3a. The first was a  
187 substitution of Gln57 present in the Wuhan-01 isolate by His57, and the second was the  
188 substitution of Gly251 by Val251. To note, only 0.04% of the sequences harboured the  
189 double His57/Val251 mutation. The presence of His in residue 57 would be expected to  
190 result in an increased positive charge at that site.

191 The Gly251Val mutation occurred in a predicted serine-phosphorylation site 248-  
192 TID(**G/V**)SSGVV-256. The introduction of a Val reduced the prediction scores for the site  
193 from a maximum >0.90 with Gly for phosphokinase B and ATM serine/threonine  
194 phosphokinase to 0.73-0.82 for the same enzymes. It is worth to note that the amino  
195 acid at this position was strongly correlated with the amino acid present in position 57  
196 of the same protein. Thus, among the sequences harbouring His57 in ORF3a, 99.8% were  
197 associated with Gly251 and only 0.2% with Val251. In contrast, for Gln57, 17% of the  
198 sequences harboured Val251 ( $p < 0.001$ ). Similarly, His57 was only found in sequences  
199 harbouring Arg203-Gly204 in the N protein, while Gln57 was found simultaneously with  
200 Arg203-Gly204 (70% of the cases) or Lys203-Arg204 (30%) ( $p < 0.001$ ). Both mutations  
201 were predicted as deleterious (scores of -3.286 for His57 and -8.581 for Val251).

202 The lack of a reliable model made impossible to make any prediction of the impact of  
203 those mutations on the 3D structure or the interactions between residues. However,  
204 the checking of the potential in the secondary structure of the protein revealed that  
205 mutation Gln57His resulted in the elimination of a turn of the protein predicted to be in  
206 Ser58. Similarly, mutation Gly251Val eliminated the turn at Gly251 but did not affect the  
207 turn predicted for Ser253 (Supplementary Fig. S3).

208 Regarding the ORF8 protein, it is worth noting that the mutation of residue 84  
209 (Leu84Ser) happened simultaneously with a silent mutation in nucleotide position 8987  
210 (ORF1ab, nsp4, A→T). This permitted to distinguish 2 clades in the initial weeks of the  
211 pandemic that contained isolates from Wuhan, Shanghai, and Hong-Kong  
212 (Supplementary Fig. S4). These clades did correspond to the L and S types reported by  
213 Tang et al. (2020). This mutation was predicted to be neutral.

214 Finally, the last change was found in the nsp6 protein, Leu37Phe, which significance was  
215 unclear. This mutation was also predicted to be neutral.

#### 216 **4. Discussion**

217 The present SARS-CoV-2 pandemic is a worst-case scenario of the introduction of a new  
218 agent that transmits easily in a completely naïve population. In this context,  
219 transmission events occur in an uncommonly high scale, in a very short period of time  
220 and with little selective pressures from the immune system if compared to an endemic  
221 situation. This scenario would permit the arising of a great diversity of viral variants of  
222 which the fitter could be expected to gain predominance.

223 In the present study, we identified 8 early mutations in the SARS-CoV-2 genome that  
224 gained prevalence over 10% at some point during the pandemic. This cut-off was  
225 arbitrarily set to discriminate random mutations and errors in sequencing from changes  
226 that might have a bigger impact. Certainly, this approach has the limitation of neglecting  
227 some mutations with lesser prevalence that still can be biologically significant. Time will  
228 show it.

229 It is worth noting that 7 out of 8 of the widely spread mutations occurred in residues  
230 that were highly conserved in related coronaviruses of bats, pangolins, civets, or in SARS-

231 CoV (Fig. 2). Conserved regions are usually assumed to be functionally relevant and thus,  
232 mutations in them may have deleterious effects or can be hardly tolerated; if so, they  
233 will be probably removed in the future. A mutation in a highly conserved region that  
234 becomes widespread and persists can be thought as representative of a change that  
235 increases viral fitness. In the present case, we found three different situations:  
236 mutations that expanded and rise to predominance, mutations that expanded to a  
237 certain extent and fade out, and mutations that are apparently expanding but not yet  
238 predominant. This pattern affecting conserved regions was also seen for SARS-CoV  
239 although the affected proteins were different. Interestingly, in SARS-CoV-2 most of the  
240 mutations were in structural proteins, while in SARS-CoV were in non-structural ones,  
241 suggesting that the adaption process from the original host species to human was  
242 different in these two cases. When the spike protein was examined, this difference was  
243 more obvious. Mutations in SARS-CoV occurred in positions conserved in the civet and  
244 bat-related coronaviruses but different from those of pangolin and SARS-CoV-2. In  
245 contrast, spike mutation in position 614 of SARS-CoV-2 affected a residue that was  
246 conserved in betacoronaviruses of pangolins, civets, bats, and SARS-CoV. This would be  
247 compatible with a scenario where those mutations affected the viral fitness for that  
248 particular new host, namely humans. The scale of the viral replication in the scenario of  
249 a pandemic would be unprecedented for those coronaviruses and will provide the  
250 probability for such beneficial mutations to appear and expand.

251 The Asp614Gly mutation in S protein is an example of a mutation becoming fully  
252 predominant. A previous report (Korber et al. 2020) already indicated its emergence.  
253 Recently, Bhattacharyya et al. (2020) suggested that the predominance of this mutation  
254 as the pandemic advanced and the low proportion in initial phases of it was related to a

255 single nucleotide deletion in the transmembrane protease serine 2 (TMPRSS2) that is  
256 common in Europeans and North Americans but rare in East Asians. The Asp614Gly  
257 mutation would introduce a cleavage site for that enzyme. This would explain, at least  
258 partially, the spread of this mutant outside Asia.

259 We do agree with Korber et al. (2020) regarding the possibility that the Asp214Gly  
260 mutation produced a laxer interaction between S1 and S2 spike domains that might  
261 facilitate shedding of S1 from membrane-bound S2. In SARS-CoV, the segment of S  
262 protein including residues 597-625 contains epitopes inducing both neutralizing  
263 antibodies (positions 604-625 in SARS-CoV) and antibodies participating in an antibody-  
264 dependent enhancement (ADE) in animal models (residues 597-625) (Wang et al. 2016).  
265 The mutation Asp614Gly would affect the epitope segment inducing ADE but not the  
266 one inducing neutralizing antibodies. Although, it has been hypothesized that ADE may  
267 have a role in CoVID-19 (Tetro 2020) this has not been demonstrated (Sharma 2020).  
268 The effects of the mutation on the immune escape or the transmission potential cannot  
269 be concluded at this moment.

270 Regarding the mutations found in the nucleocapsid phosphoprotein, the first surprising  
271 fact was to find two consecutive substitutions in the highly conserved serine-rich  
272 segment of the LKR region of the protein. The LKR region is essential for conferring  
273 flexibility to the protein as well as for cell signalling, binding to RNA and to M protein. It  
274 also contains multiple phosphorylation sites in the SR segment that are thought to be  
275 essential (Reviewed by McBride et al. 2014). Since the mutant nucleocapsid introduced  
276 a Lys residue - a canonical target for sumoylation - and sumoylation occurs in this region  
277 by analogy to SARS-CoV (Fan et al. 2006) we also tested it. No significant differences

278 were determined between the original and the mutant sequences using prediction tools  
279 for phosphorylation or sumoylation.

280 Interaction of the nucleocapsid protein with the M protein is thought to happen  
281 between the SR-region and the C-terminal domain of M (Escors et al. 2001; Kuo and  
282 Masters 2002). We found that the M175 phenotype of the M protein was almost  
283 exclusively associated to the 203K-204R phenotype of the nucleocapsid protein. It is  
284 tempting to hypothesize that the above-mentioned residues may be involved in such  
285 interaction. Besides this, the introduction of an additional charge in the SR segment may  
286 enhance interaction with RNA which core is negatively charged.

287 Changes in the ORF3a protein have been recently reported to define microclonal clades  
288 of SARS-CoV2 (Issa et al. 2020). We have found that the introduction of Val251 was  
289 apparently non compatible with His57. We determined that, probably, such mutations  
290 affected the secondary structure by changing the number of turns. Considering that  
291 both residues are out of the functional domains proposed by Issa et al. (2020), those  
292 changes in the structure of the protein may modify interactions enough to be non-  
293 compatible. Interestingly, mutations in ORF3a protein and mutations in the  
294 nucleocapsid protein were related. To our knowledge, these two proteins have not been  
295 investigated for interactions; however, this finding suggests that might be an interaction  
296 between them.

297 ORF8 mutation Leu84Ser was reported before (Tang et al. 2020). The authors suggested  
298 that the Leu variant (called L) is more aggressive and spreads easier. The evolution of  
299 the proportion of strains harbouring this mutation would not support the idea of a  
300 higher transmissibility of the L variant since its frequency clearly declined. Certainly, the

301 introduction of such variant in different countries applying control measures earlier or  
302 later could have had an impact on the spread of the variants as well.

303 Finally, the nsp6 mutation at position 37 is difficult to interpret. The nsp6 of  
304 coronaviruses is part of the replication machinery of the virus and has been reported to  
305 induce autophagosomes (Benvenuto et al. 2020). The same authors suggested that it  
306 may lead to a lower stability of the protein structure. Lacking a verified model for the  
307 protein it is difficult to assess whether this happens or not. Interestingly, the same  
308 authors indicated that the distribution of the Leu phenotype was restricted to Asia while  
309 the Phe was common in other parts of the world. According to our analysis, the Phe  
310 phenotype has almost disappeared in current sequences. The discrepancy could be  
311 originated in the fact that Benvenuto et al. (2020) analysed the 351 sequences available  
312 in a past moment while in the present analysis thousands of sequences from all over the  
313 world have been included.

314 In summary, the present is a comprehensive report of the amino acid mutations that  
315 gained spread during the SARS-CoV-2 pandemic up to now. Most of the substitutions  
316 gaining wide diffusion occurred in conserved positions indicating that they probably had  
317 a functional impact but, differently from SARS-CoV, they accumulated in structural  
318 proteins. Interestingly, most of these mutations faded out, except for the Asp614Gly in  
319 the S protein that became predominant suggesting that it contributed to viral fitness.  
320 Some others are still increasing in prevalence, like the mutations in the nucleocapsid  
321 protein here reported and that might be related to the mutations in the M protein. This  
322 data may serve to gain further insight in the evolution of SARS-CoV-2.



## 323 5. Acknowledgements

324 The authors would like to thank to all those who contribute in the fight against the SARS-  
325 CoV-2. We would like to thank as well all those who kindly shared genome data in  
326 publicly available databases, available for download from <https://www.gisaid.org/>.

## 327 6. Author contributions

328 MC, YL, ID, HC, LD and EM participated in all tasks of the present work.

## 329 7. Funding

330 Martí Cortey was funded by the Ramon y Cajal program (reference RYC-2015-17154).  
331 Hepzibar Clilverd was supported by a fellowship of the Spanish Ministry of Science and  
332 Innovation (program FPU). No other funding sources.

333 **8. Conflict of interest:** None declared.

## 334 9. Supplementary Material

335 **Supplementary Table S1.** Distribution by continents, in percentages, of the 8 amino acid  
336 mutations detected across the 12,562 genomes analysed.

337

338 **Supplementary Table S2.** Localizations of the amino acid mutations in SARS CoV that  
339 gained prevalence compared with SARS-CoV-2, civet, pangolin, and bat-related  
340 coronaviruses.

341

342 **Supplementary Figure S3.** Secondary structure of the original ORF3a (A) or the mutant  
343 variants (B & C).

344

345 **Supplementary Figure S4.** Neighbor-Joining tree based on the Tamura-Nei distances,  
346 constructed with the 20 earliest complete genomes harbouring a Leucine or a Serine in  
347 the amino acid residue 84 of the ORF8 protein. Isolation dates as reported in the GISAID  
348 database ([www.gisaid.org](http://www.gisaid.org)). Numbers along the internal branches represent their  
349 confidence after the initial dataset was resampled with 1,000 bootstrap replicates.

---

## 350 **10. References**

351 Ashok-Kumar, T. (2013) 'CFSSP: Chou and Fasman Secondary Structure Prediction  
352 server', *Wide Spectrum*, 9: 15-19.

353 Benvenuto, D. et al. (2020) 'Evolutionary analysis of SARS-CoV-2: how mutation of Non-  
354 Structural Protein 6 (NSP6) could affect viral autophagy', *Journal of Infection*, 4453:  
355 30186–9.

356 Bhattacharyya , C. et al. (2020) 'Global Spread of SARS-CoV-2 Subtype with Spike Protein  
357 Mutation D614G is Shaped by Human Genomic Variations that Regulate Expression of  
358 TMPRSS2 and MX1 Genes', *bioRxiv*, doi.org/10.1101/2020.05.04.075911.

359 Chan J.F., et al. (2020) 'Genomic characterization of the 2019 novel human-pathogenic  
360 coronavirus isolated from a patient with atypical pneumonia after visiting Wuhan',  
361 *Emerging Microbes & Infections*, 9: 221–36.

362 Choi, Y. et al. (2012) 'Predicting the Functional Effect of Amino Acid Substitutions and  
363 Indels', *PLoS ONE*, 7: e46688.

- 364 Escors D. et al. (2001) 'The membrane M protein carboxy terminus binds to transmissible  
365 gastroenteritis coronavirus core and contributes to core stability', *Journal of Virology*,  
366 75: 1312–24.
- 367 Fan, Z. et al. (2006) 'SARS-CoV nucleocapsid protein binds to hUbc9, a ubiquitin  
368 conjugating enzyme of the sumoylation system', *Journal of Medical Virology*, 78: 1365-  
369 73.
- 370 Hall, T. A. (1999) 'BioEdit: a user-friendly biological sequence alignment editor and  
371 analysis program for Windows 95/98/NT', *Nucleic Acids Symposium Series*, 41: 95–8.
- 372 He, J. F. et al. (2004) 'Molecular Evolution of the SARS Coronavirus During the Course of  
373 the SARS Epidemic in China', *Science*, 303: 1666-9.
- 374 Issa, E. et al. (2020) 'SARS-CoV-2 and ORF3a: Non-Synonymous Mutations and  
375 Polyproline Regions', *mSystems*, 5: e00266–20.
- 376 Khailany, R. A. et al. (2020) 'Genomic characterization of a novel SARS-CoV-2', *Gene*  
377 *Reports*, 19: 100682.
- 378 Korber B. et al. (2020) 'Spike mutation pipeline reveals the emergence of a more  
379 transmissible form of SARS-CoV-2', *bioRxiv* 2020.04.29.069054.
- 380 Kuo, L. and Masters, P.S. (2002) 'Genetic evidence for a structural interaction between  
381 the carboxy termini of the membrane and nucleocapsid proteins of mouse hepatitis  
382 virus', *Journal of Virology*, 76: 4987–99.
- 383 Lu, R. et al. (2020) 'Genomic characterisation and epidemiology of 2019 novel  
384 coronavirus: implications for virus origins and receptor binding', *Lancet*, 395: 565–74.

- 385 McBride, R. et al. (2014) 'The coronavirus nucleocapsid is a multifunctional protein',  
386 *Viruses*, 6: 2991–3018.
- 387 Sharma, A. (2020) 'It is too soon to attribute ADE to COVID-19', *Microbes and Infection*,  
388 S1286-4579(20)30051-4.
- 389 Tang, X. et al. (2020) 'On the origin and continuing evolution of SARS-CoV-2', *National*  
390 *Science Review*, nwaa036.
- 391 Tang, X. et al. (2020) 'On the origin and continuing evolution of SARS-CoV-2', *National*  
392 *Science Review*, nwaa036.
- 393 Tetro, J.A. (2020) 'Is COVID-19 receiving ADE from other coronaviruses?', *Microbes &*  
394 *Infection*, 22: 72–3.
- 395 Thompson, J. D. et al. (1994) 'CLUSTAL W: improving the sensitivity of progressive  
396 multiple sequence alignment through sequence weighting, position-specific gap  
397 penalties and weight matrix choice', *Nucleic Acids Research*, 22: 4673–80.
- 398 Wang, Q. et al. (2016) 'Immunodominant SARS Coronavirus Epitopes in Humans Elicited  
399 both Enhancing and Neutralizing Effects on Infection in Non-human Primates', *ACS*  
400 *Infectious Diseases*, 5: 361–76.
- 401 Wrapp, D. et al. (2020) 'Cryo-EM structure of the 2019-nCoV spike in the prefusion  
402 conformation', *Science*, 367: 1260–3.
- 403 Zhou, P. et al. (2020) 'A pneumonia outbreak associated with a new coronavirus of  
404 probable bat origin', *Nature*, 579: 270–3.

405 Zhu, N. et al. (2020) 'A Novel Coronavirus from Patients with Pneumonia in China, 2019',  
406 *The New England Journal of Medicine*, 382: 727–33.

407

408 **Supplementary Table S1.** Distribution by continents, in percentages, of the 8 amino acid mutations detected across the 12,562 SARS-CoV-2  
 409 genomes analysed.

| Location                 | nsp6-37     |             | S-614          |             | ORF3a-57     |             | ORF3a-251       |             | M-175             |            | ORF8-84     |             | N-203         |             | N204          |             |
|--------------------------|-------------|-------------|----------------|-------------|--------------|-------------|-----------------|-------------|-------------------|------------|-------------|-------------|---------------|-------------|---------------|-------------|
| 1st Report               | Wuhan 18/01 |             | Shanghai 23/01 |             | France 21/02 |             | Hong-Kong 23/01 |             | Netherlands 24/02 |            | Wuhan 05/01 |             | England 23/02 |             | England 23/02 |             |
| Aa Change                | Leu         | Phe         | Asp            | Gly         | Gln          | His         | Gly             | Val         | Thr               | Met        | Leu         | Ser         | Arg           | Lys         | Gly           | Arg         |
| <b>Asia (n=741)</b>      | 81,8        | 18,2        | 69,1           | 30,9        | 82,8         | 17,2        | 90,6            | 9,4         | 98,6              | 1,4        | 80,6        | 19,4        | 94,4          | 5,6         | 94,4          | 5,6         |
| <b>Europe (n=7,571)</b>  | 81,1        | 18,9        | 20,6           | 79,4        | 83,3         | 16,7        | 86,1            | 13,9        | 92,0              | 8,0        | 93,2        | 6,8         | 68,6          | 31,4        | 68,6          | 31,4        |
| <b>America (n=3,238)</b> | 95,8        | 4,2         | 37,2           | 62,8        | 48,6         | 51,4        | 97,9            | 2,1         | 99,4              | 0,6        | 72,0        | 28,0        | 96,1          | 3,9         | 96,1          | 3,9         |
| <b>Africa (n=110)</b>    | 90,3        | 9,7         | 14,7           | 85,3        | 80,0         | 20,0        | 96,8            | 3,2         | 100,0             | 0,0        | 92,6        | 7,4         | 90,4          | 9,6         | 90,4          | 9,6         |
| <b>Oceania (n=902)</b>   | 69,7        | 30,3        | 46,5           | 53,5        | 69,9         | 30,1        | 87,4            | 12,6        | 95,5              | 4,5        | 79,5        | 20,5        | 86,7          | 13,3        | 86,7          | 13,3        |
| <b>Mean (n=12,562)</b>   | <b>84,2</b> | <b>15,8</b> | <b>29,7</b>    | <b>70,3</b> | <b>73,1</b>  | <b>26,9</b> | <b>89,7</b>     | <b>10,3</b> | <b>94,6</b>       | <b>5,4</b> | <b>86,1</b> | <b>13,9</b> | <b>78,7</b>   | <b>21,3</b> | <b>78,7</b>   | <b>21,3</b> |

410

411

412 **Supplementary Table S2.** Localizations of the amino acid mutations in SARS CoV that gained prevalence compared with SARS-CoV-2, civet,  
 413 pangolin, and bat-related coronaviruses.

| Protein                           | ORF1ab<br>(nsp3) | ORF1ab<br>(nsp3) | ORF1ab<br>(nsp3) | ORF1ab<br>(nsp4) | ORF1ab<br>(nsp4) | ORF1ab<br>(nsp4) | ORF1ab<br>(nsp4) | ORF1ab<br>(nsp16) | ORF2S | ORF2S | ORF2S |
|-----------------------------------|------------------|------------------|------------------|------------------|------------------|------------------|------------------|-------------------|-------|-------|-------|
| Aa position in the protein        | 303              | 844              | 1298             | 6                | 231              | 307              | 332              | 138               | 242   | 347   | 1166  |
| Original SARS-CoV                 | T                | I                | F                | W                | A                | A                | A                | K                 | L     | R     | E     |
| Mutated Aa in SARS-CoV            | I                | L                | L                | C                | V                | V                | V                | R                 | S     | K     | K     |
| AY572034-SARS-CoV-civet007        | T                | I                | L                | W                | A                | A                | A                | R                 | S     | R     | E     |
| SARS-CoV-2 WH-01-ISL402123        | T                | I                | A                | W                | A                | A                | V                | K                 | T     | R     | K     |
| MT084071-Pangolin-CoV-MP789       | T                | I                | Del              | W                | A                | A                | V                | K                 | T     | R     | K     |
| KY417146-Bat-SARS-like-CoV-Rs4231 | T                | I                | L                | W                | A                | A                | A                | K                 | L     | R     | K     |
| MN996532-Bat-CoV-RaTG13           | T                | I                | A                | W                | A                | A                | A                | K                 | T     | R     | K     |
| MK211376-BtRs-BetaCoV/YN2018B     | T                | I                | L                | W                | A                | A                | A                | K                 | P     | R     | K     |

414

415 **Supplementary Figure S3. Secondary structure of the original ORF3a (A) or the mutant**  
416 **variants (B & C). H = alpha-helix, E = Beta sheet, T = Turn**

417 **A) Original ORF3a protein**  
418  
419  
420  
421  
422  
423  
424  
425  
426

|       |   |                                                           |                                                |            |      |            |         |              |    |
|-------|---|-----------------------------------------------------------|------------------------------------------------|------------|------|------------|---------|--------------|----|
|       |   | 10                                                        | 20                                             | 30         | 40   | 50         | 60      |              |    |
|       |   | *                                                         | *                                              | *          | *    | *          | *       |              |    |
| Query | 1 | MDLFMRIFTIGTVTLKQGEIKDATPSDFVRATATIPIQASLPPGWLIVGVALLAVFQ | SASKIITLKKRWQ                                  | 70         |      |            |         |              |    |
| Helix | 1 | HHHHHHHHHHHHHHHHHHHHHH                                    | HHHHHHHHHHHHHHHHHHHHHHHHHHHHHHHHHHHHHHHHHHHHHH | 70         |      |            |         |              |    |
| Sheet | 1 | EEEEEEEEEEEEEEEE                                          | EEEEEEEEEEEEEEEEEEEEEEEEEEEEEEEEEEEE           | 70         |      |            |         |              |    |
| Turns | 1 |                                                           | TT T T                                         | T          |      |            | T       | 70           |    |
| Struc | 1 | HHHEEEEEEEEEEH                                            | HHHHHHHT                                       | CEEEEEHHEE | HHHT | EEEEEEEEEE | HHEEHHT | HHHEEHHHHEHH | 70 |

427  
428  
429  
430  
431  
432  
433  
434  
435

|       |     |                                  |                           |                      |         |           |      |           |     |
|-------|-----|----------------------------------|---------------------------|----------------------|---------|-----------|------|-----------|-----|
|       |     | 220                              | 230                       | 240                  | 250     | 260       | 270  |           |     |
|       |     | *                                | *                         | *                    | *       | *         | *    |           |     |
| Query | 211 | YYQLYSTQLSTDTGVEHVTF             | FFIYNKIVDEPEEHVQIHTIDGSSG | VVNPVMEPIYDEPTTT     | TSVPL   | 275       |      |           |     |
| Helix | 211 | HHHHHHHHHHHHHHHHHHHHHHHHHHHHHHHH | HHHHHHHH                  | 275                  |         |           |      |           |     |
| Sheet | 211 | EEEEEEEEEEEEEEEEEEEEEEEEEEEE     | EEEE                      | EEEEEEEEEEEEEEEEEEEE | 275     |           |      |           |     |
| Turns | 211 | T                                | T T                       | T T                  |         | T         | 275  |           |     |
| Struc | 211 | EEEEEEEEEEEEEH                   | HEEEEEEE                  | HHHHHHHEE            | EEHCTCT | CEEEHHHEE | HEET | EEEEEECCC | 275 |

436  
437  
438 **B) Gln57His mutant**  
439  
440  
441  
442  
443  
444  
445  
446  
447

|       |   |                                                           |                                                |            |      |            |       |                |    |
|-------|---|-----------------------------------------------------------|------------------------------------------------|------------|------|------------|-------|----------------|----|
|       |   | 10                                                        | 20                                             | 30         | 40   | 50         | 60    |                |    |
|       |   | *                                                         | *                                              | *          | *    | *          | *     |                |    |
| Query | 1 | MDLFMRIFTIGTVTLKQGEIKDATPSDFVRATATIPIQASLPPGWLIVGVALLAVFQ | SASKIITLKKRWQ                                  | 70         |      |            |       |                |    |
| Helix | 1 | HHHHHHHHHHHHHHHHHHHHHH                                    | HHHHHHHHHHHHHHHHHHHHHHHHHHHHHHHHHHHHHHHHHHHHHH | 70         |      |            |       |                |    |
| Sheet | 1 | EEEEEEEEEEEEEEEE                                          | EEEEEEEEEEEEEEEEEEEEEEEEEEEEEEEEEEEE           | 70         |      |            |       |                |    |
| Turns | 1 |                                                           | TT T T                                         | T          |      |            | T     | 70             |    |
| Struc | 1 | HHHEEEEEEEEEEH                                            | HHHHHHHT                                       | CEEEEEHHEE | HHHT | EEEEEEEEEE | HHEEH | HHHHHEEHHHHEHH | 70 |

448  
449  
450 **C) Gly251Val mutant**  
451  
452  
453  
454  
455  
456  
457  
458  
459

|       |     |                                  |                                      |                  |         |           |      |           |     |
|-------|-----|----------------------------------|--------------------------------------|------------------|---------|-----------|------|-----------|-----|
|       |     | 220                              | 230                                  | 240              | 250     | 260       | 270  |           |     |
|       |     | *                                | *                                    | *                | *       | *         | *    |           |     |
| Query | 211 | YYQLYSTQLSTDTGVEHVTF             | FFIYNKIVDEPEEHVQIHTIDGSSG            | VVNPVMEPIYDEPTTT | TSVPL   | 275       |      |           |     |
| Helix | 211 | HHHHHHHHHHHHHHHHHHHHHHHHHHHHHHHH | HHHHHHHH                             | 275              |         |           |      |           |     |
| Sheet | 211 | EEEEEEEEEEEEEEEEEEEEEEEEEEEE     | EEEEEEEEEEEEEEEEEEEEEEEEEEEEEEEEEEEE | 275              |         |           |      |           |     |
| Turns | 211 | T                                | T T                                  | T                |         | T         | 275  |           |     |
| Struc | 211 | EEEEEEEEEEEEEH                   | HEEEEEEE                             | HHHHHHHEE        | EEHCTCT | CEEEHHHEE | HEET | EEEEEECCC | 275 |

460  
461  
462



463 **Supplementary Figure S4.** Neighbor-Joining tree based on the Tamura-Nei distances,  
464 constructed with the 20 earliest complete genomes harbouring a Leucine or a Serine in  
465 the amino acid residue 84 of the ORF8 protein. Isolation dates as reported in the GISAID  
466 database (<https://www.gisaid.org/>). Numbers along the internal branches represent  
467 their confidence after the initial dataset was resampled with 1,000 bootstrap replicates.

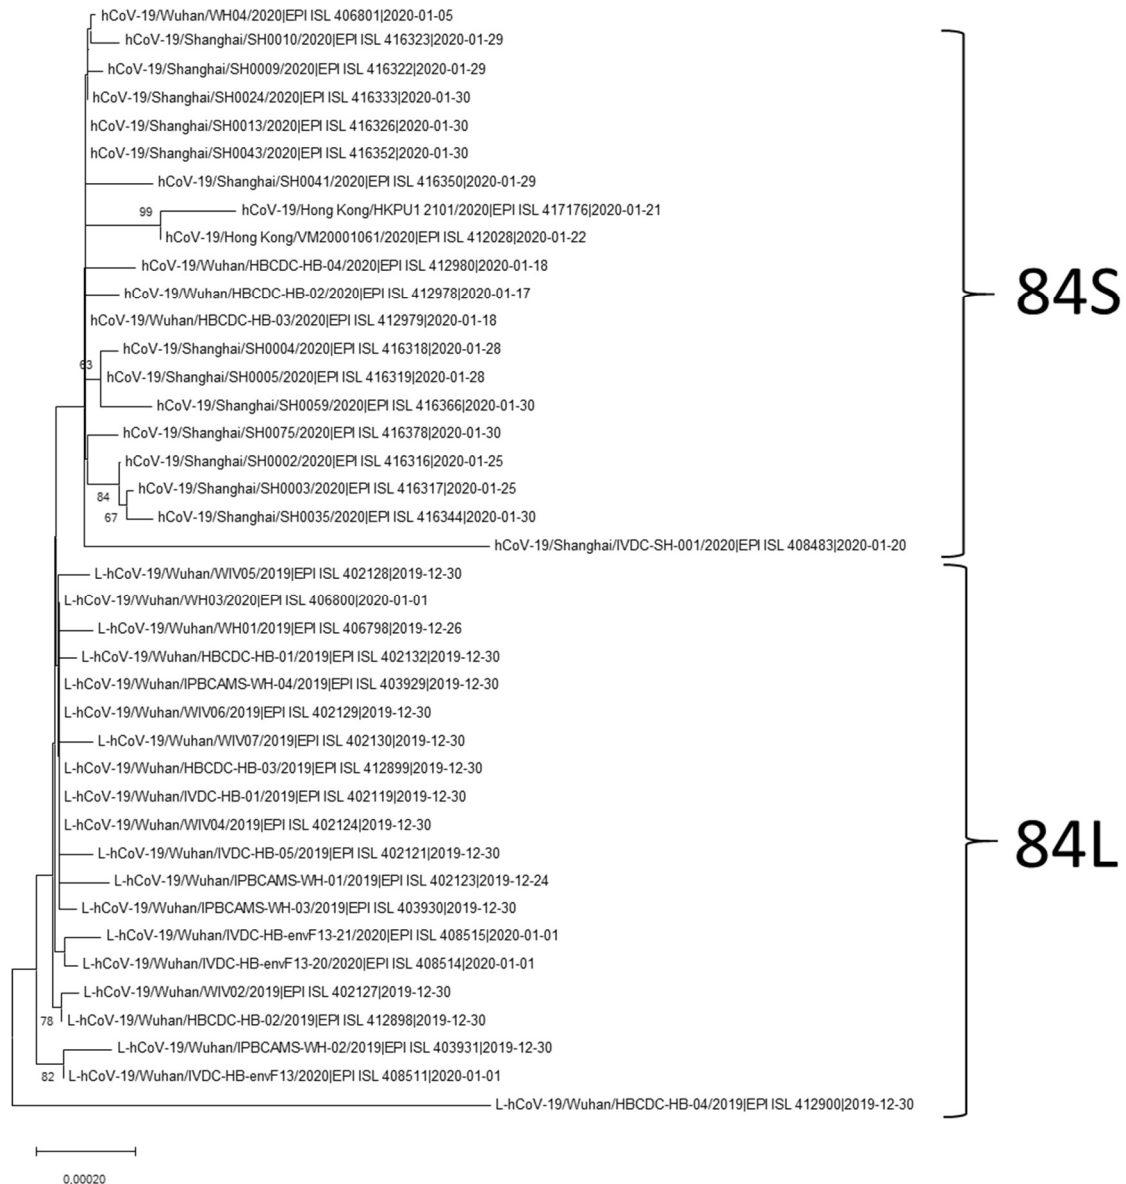

Source: https://www.biorxiv.org/content/10.1101/2020.05.16.099499v1.full.pdf
